# Supplementary material for: The expression profile and clinic significance of the SIX family in non-small cell lung cancer
Source: Springer Nature journal article supplement (doi:10.1186/s13045-016-0339-1), 2016-11-08
Supplement: MOESM1 [file 11029282]

## The expression profile and clinic significance of the SIX family in non-small cell lung cancer

Qian Liu<sup>1</sup>, Anping Li<sup>2</sup>, Yijun Tian<sup>1</sup>, Yu Liu<sup>3</sup>, Tengfei Li<sup>2</sup>, Cuntai Zhang<sup>3</sup>, Jennifer D. Wu<sup>4</sup>, Xinwei Han<sup>2</sup>, Kongming Wu<sup>1</sup>

1. Department of Oncology, Tongji Hospital of Tongji Medical College, Huazhong University of Science and Technology, 1095 Jiefang Avenue, Wuhan 430030, P.R. China.
2. Department of Interventional Radiology, The First Affiliated Hospital of Zhengzhou University, Zhengzhou, 450052, China.
3. Department of Geriatric, Tongji Hospital of Tongji Medical College, Huazhong University of Science and Technology, Wuhan, 430030, China.
4. Department of Microbiology and Immunology, Hollings Cancer Center, Medical University of South Carolina, Charleston, South Carolina, USA

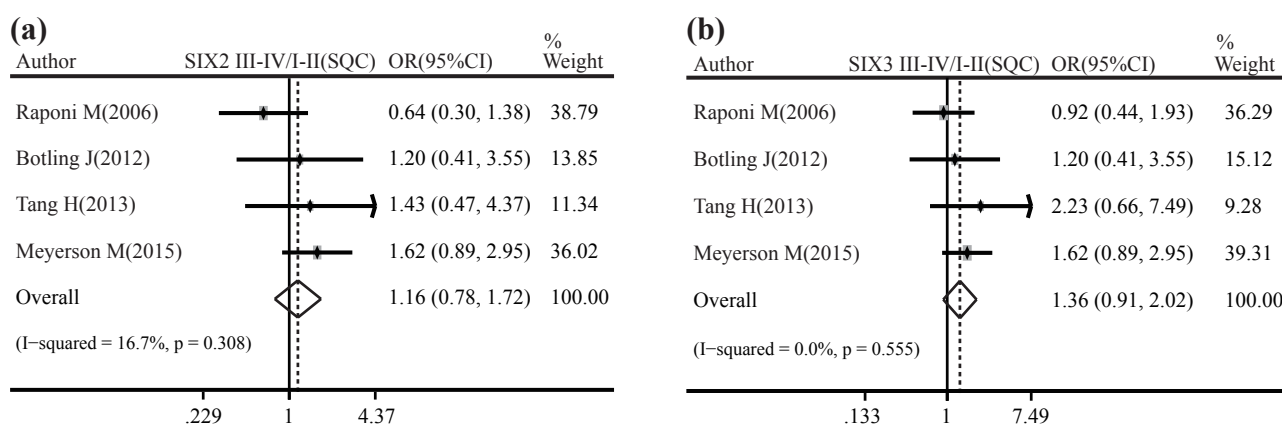

**Additional file 1.** Forest plot of odds ratio (OR). CI, confidence interval. **(a).** Relative mRNA expression of SIX2 between III-IV and I-II patients in SQC. **(b).** Relative mRNA expression of SIX2 between III-IV and I-II patients in SQC.
