# Supplementary material for: The expression profile and clinic significance of the SIX family in non-small cell lung cancer
Source: Springer Nature journal article supplement (doi:10.1186/s13045-016-0339-1), 2016-11-08
Supplement: MOESM2 [file 11029282]

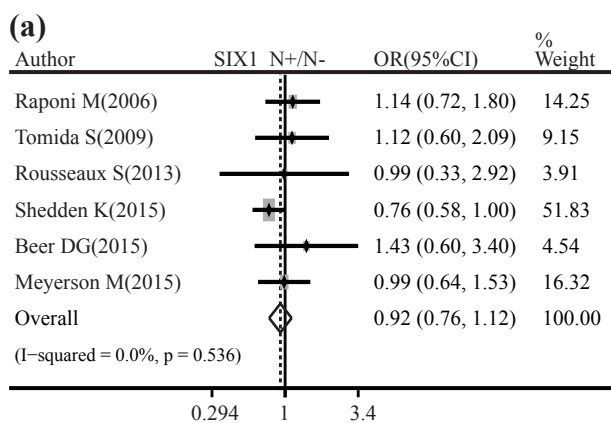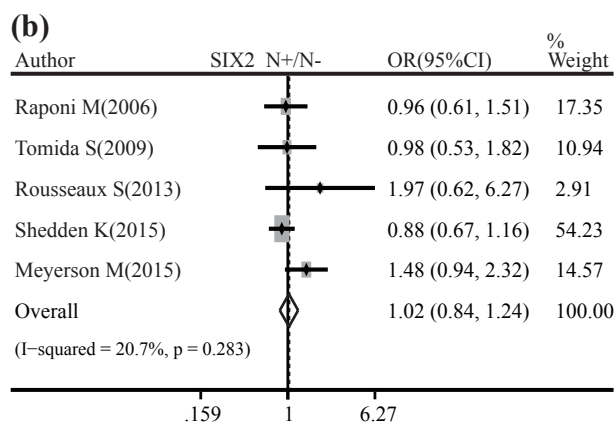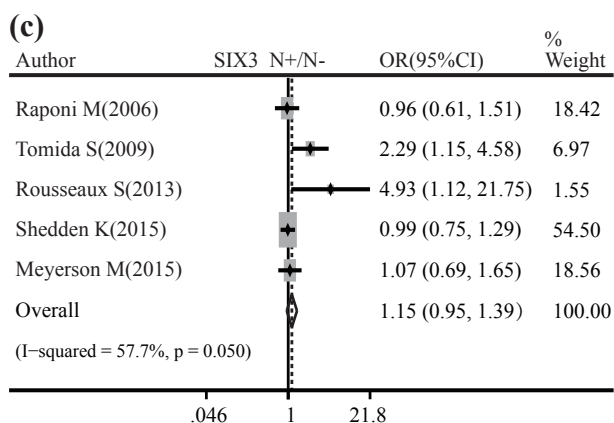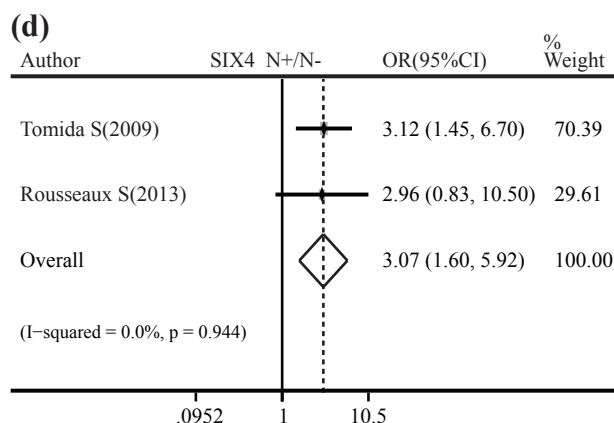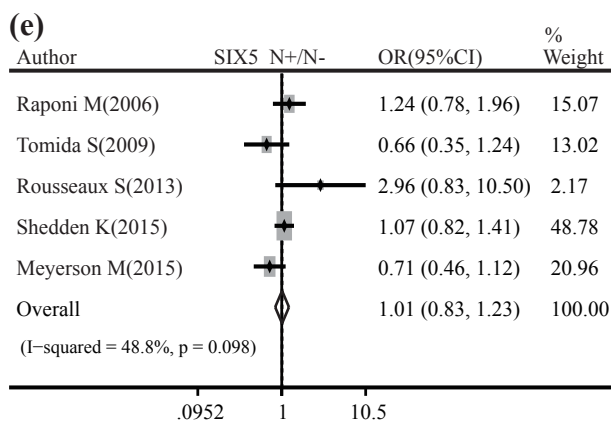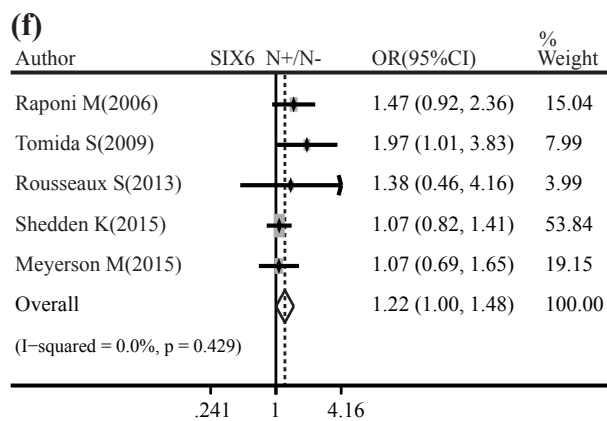

**Additional file 2.** Forest plot of odds ratio (OR). CI, confidence interval. **(a).** Association between mRNA expression of SIX1 and NSCLC lymph node metastasis. **(b).** Association between mRNA expression of SIX2 and NSCLC lymph node metastasis. **(c).** Association between mRNA expression of SIX3 and NSCLC lymph node metastasis. **(d).** Association between mRNA expression of SIX4 and NSCLC lymph node metastasis. **(e).** Association between mRNA expression of SIX5 and NSCLC lymph node metastasis. **(f).** Association between mRNA expression of SIX6 and NSCLC lymph node metastasis.
