# Supplementary material for: The expression profile and clinic significance of the SIX family in non-small cell lung cancer
Source: Springer Nature journal article supplement (doi:10.1186/s13045-016-0339-1), 2016-11-08
Supplement: MOESM4 [file 11029282]

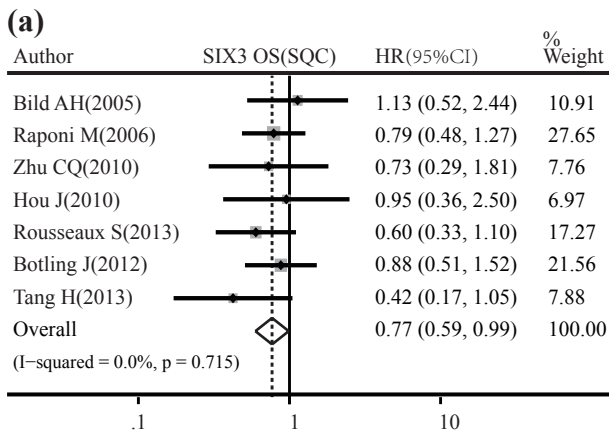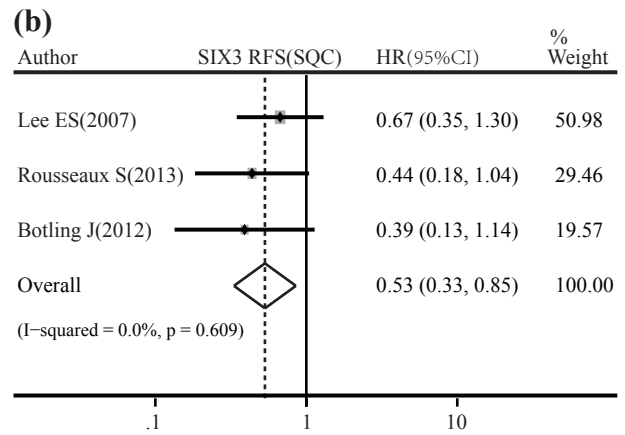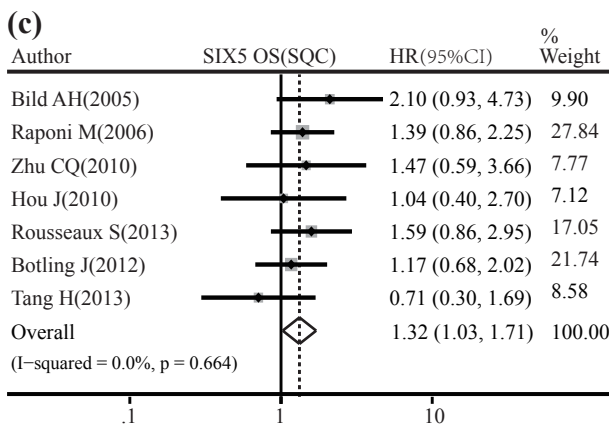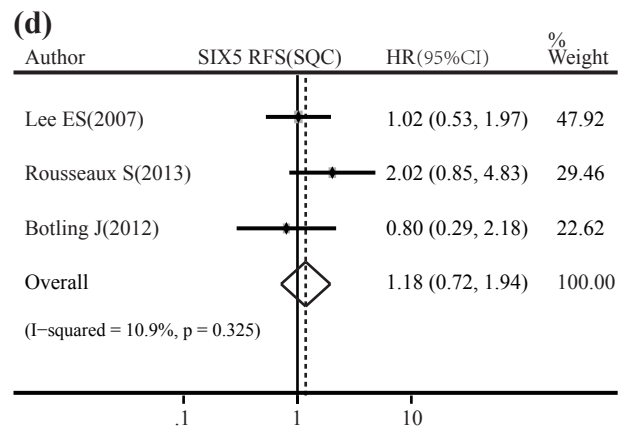

**Additional file 4.** Forest map of hazard ratio(HR). CI, confidence interval. **(a).** Association between SIX3 and SQC OS. **(b).** Association between SIX3 and SQC RFS. **(c).** Association between SIX5 and SQC OS. **(d).** Association between SIX5 and SQC RFS.
